# Supplementary material for: Amine assisted top-down delamination of the two-dimensional metal–organic framework Cu2(bdc)2
Source: Royal Society of Chemistry journal article supplement (doi:10.1039/c7dt03890a), 2017-01-01
Supplement: c7dt03890a1.pdf [file c7dt03890a1.pdf]

## Supporting Information

### ***Amine Assisted Top Down Delamination of the Two-Dimensional Metal-Organic Framework $\text{Cu}_2(\text{bdc})_2$***

Christel Kutzscher, André Gelbert, Sebastian Ehrling, Claudia Schenk, Irena Senkovska, and Stefan Kaskel\*

Department of Inorganic Chemistry, Technische Universität Dresden, Bergstraße 66, D-01069 Dresden, Germany.

E-mail: [Stefan.Kaskel@chemie.tu-dresden.de](mailto:Stefan.Kaskel@chemie.tu-dresden.de)

## 1. General methods, equipment and parameters

**Chemicals** were purchased from Sigma Aldrich, TCI, Acros Organics, AppliChem, and Riedel-de Haën and used without further purification. Solvents were purchased from Sigma Aldrich, Fischer Chemicals or Acros Organics and stored under argon. Delamination tests were performed under argon atmosphere in Schlenk tubes.

**Powder X-ray diffraction** (PXRD) patterns were collected using a Stoe StadiP system in transmission mode. Samples were prepared in flat base sample holders. 3° Step wide and 80 sec per step exposure time were used. For measurements Cu K<sub>α1</sub> radiation ( $\lambda=0.15405$  nm) was applied.

**Scanning electron microscope** (SEM) analysis was performed on the SU8020 scanning electron microscope (HITACHI, Japan) with an accelerating voltage of 1-2 kV. Dried materials were sputtered with gold. Average particle size was estimated from 10-20 measurements.

For **nitrogen physisorption** experiments a Belsorp-max system from MicrotracBEL (Japan) was used. The samples were additionally activated at 150 °C for 18 hours prior to measurements. The analysis was performed at 77 K.

Solid state **infrared** (IR) spectroscopy was performed using the Vertex 70 instrumentation of Bruker in DRIFT-IR mode. Samples were mixed with dry KBr (0.5 mg MOF + 100 mg KBr) directly before measurements. The spectrum was recorded with 32 scans in the frequency range of 4000 - 400 cm<sup>-1</sup>.

**Atomic force microscopy** (AFM) was performed with the Dimension D3100 instrumentation of the Digital Instruments Company. The samples were prepared on a mica sample holder by dropping the particle containing suspension on the substrate. For **transmission electron microscopy** (TEM) JEM-1400 Plus system (JOEL Company) was applied with an operating voltage of 120 kV. The samples were prepared on a carbon covered copper-grid by dropping particle containing suspension (3 x 10 µL) on the sample holder.

## 2. Synthesis and characterization

### 2.1 Synthesis of Cu<sub>2</sub>(bdc)<sub>2</sub> bulk material

Synthesis was performed according to the procedure reported by Carson *et al.*<sup>2</sup>

Terephthalic acid (66.6 mg, 0.4 mmol) and Cu(NO<sub>3</sub>)<sub>2</sub>·3H<sub>2</sub>O (96.8 mg, 0.4 mmol) were dissolved in 8 mL DMF (p.a.). The solution was placed into a glass tube and heated at 100 °C for 24 h. The bluish green precipitate was washed with fresh DMF several times. **Yield:** 45 mg (50% based on linker amount)

The activation was performed in 2 different ways:

- 1) Direct activation from DMF: The sample was dried in high vacuum at 220 °C for 24 h.

- 2) Activation from ethanol after solvent exchange: The DMF was exchanged to ethanol by soaking of crystals in EtOH for several days. Subsequently the sample was dried in high vacuum at 80 °C for 24 h.

The activated samples were stored under inert gas atmosphere until further handling.

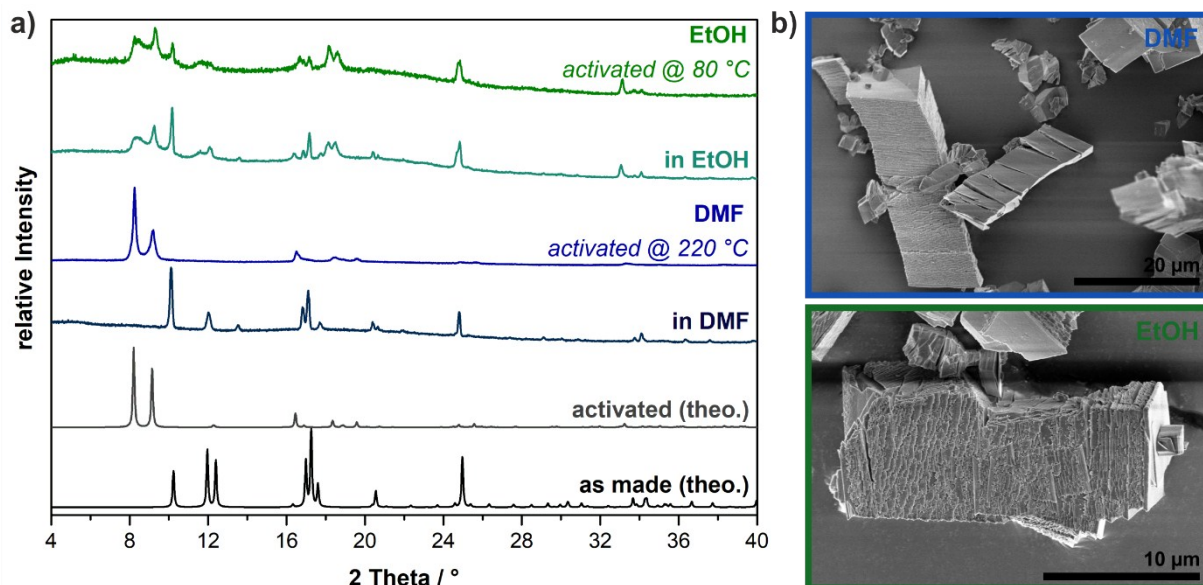

**Figure S1** a) Powder X-ray diffraction patterns of the  $\text{Cu}_2(\text{bdc})_2$ : as made and activated theoretical,<sup>1,2</sup> as synthesized in DMF, activated from DMF at 220 °C, as synthesized in ethanol, activated from ethanol at 80 °C. b) SEM images of  $\text{Cu}_2(\text{bdc})_2$  after activation from DMF 220 °C and ethanol at 80 °C.

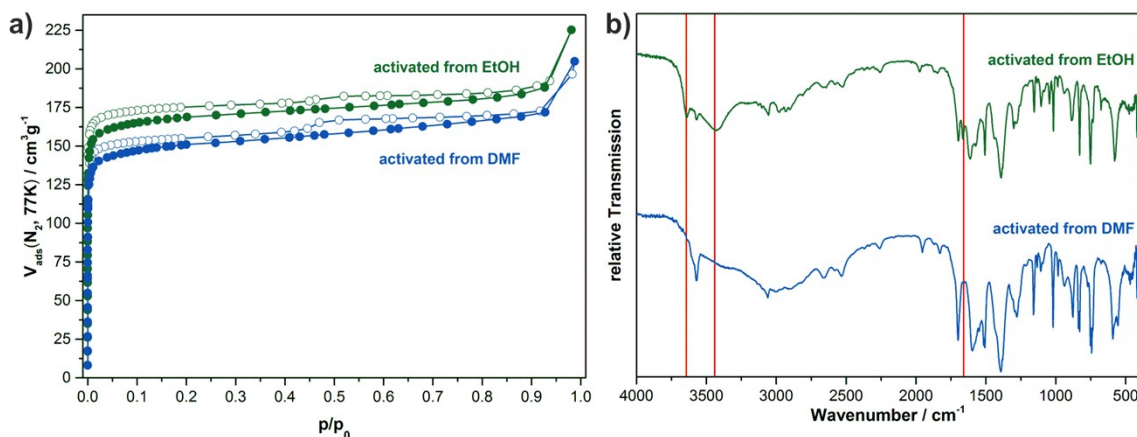

**Figure S2** a) Nitrogen physisorption isotherms of the  $\text{Cu}_2(\text{bdc})_2$  bulk materials activated from DMF at 220 °C and ethanol at 80 °C. b) IR spectra of  $\text{Cu}_2(\text{bdc})_2$  after activation from DMF and ethanol at respective temperature.

## 2.2 Delamination of $\text{Cu}_2(\text{bdc})_2$ by various amines

$\text{Cu}_2(\text{bdc})_2$  sample activated at 220 °C (20 mg, 0.09 mmol) was placed in a GC vial, which was positioned in a Schlenk tube. On top of the GC vial a triangular stirring bar was located, which had no direct contact to the powder. A corresponding amine (see Table S1) solved in 5 mL ethanol was added to the MOF sample. The batch was stirred at ambient temperature under argon atmosphere for 24 hours and the resulting solid was finally washed with ethanol for several times.

**Table S1** Amine amounts applied in delamination tests with  $\text{Cu}_2(\text{bdc})_2$ .

| Entry | Amine         | Volume / Mass      | Amount [mmol] |
|-------|---------------|--------------------|---------------|
| 1     | ethylamine    | 17.5 $\mu\text{L}$ | 0.12          |
| 2     | diethylamine  | 23.0 $\mu\text{L}$ | 0.22          |
| 3     | triethylamine | 30.5 $\mu\text{L}$ | 0.22          |
| 4     | octylamine    | 36.5 $\mu\text{L}$ | 0.22          |
| 5     | oleylamine    | 68.9 $\mu\text{L}$ | 0.21          |
| 6     | ABCO          | 55.6 mg            | 0.50          |

### 2.3 Delamination of $\text{Cu}_2(\text{bdc})_2$ with ethylamine and octylamine

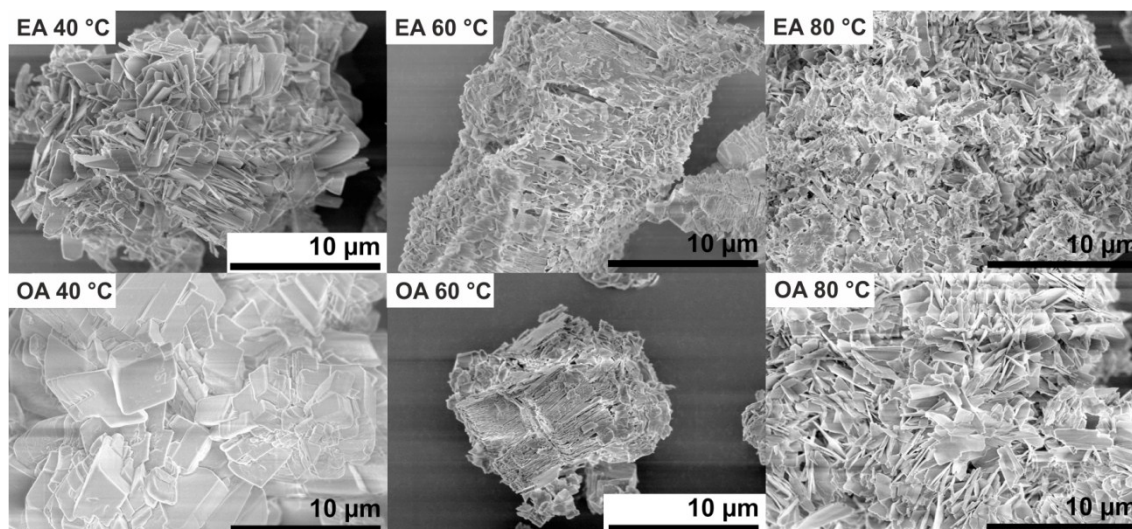

**Figure S3** SEM images of  $\text{Cu}_2(\text{bdc})_2$  after delamination in ethanol with ethylamine or octylamine at 40, 60 and 80 °C, respectively.

N–H stretch 3400-3250  $\text{cm}^{-1}$

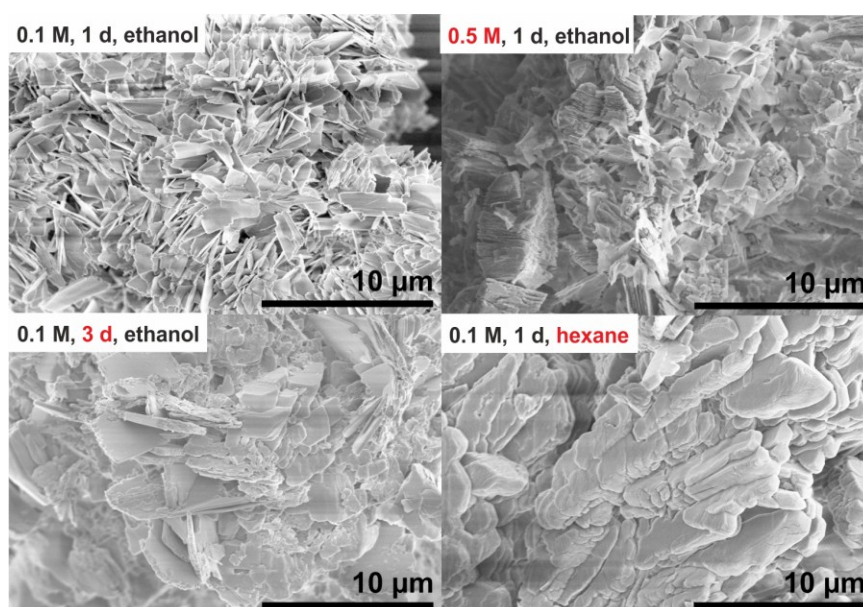

**Figure S4** SEM images of  $\text{Cu}_2(\text{bdc})_2$  after delamination tests with octylamine at 80 °C and varying parameters: concentration, treatment time, solvent.

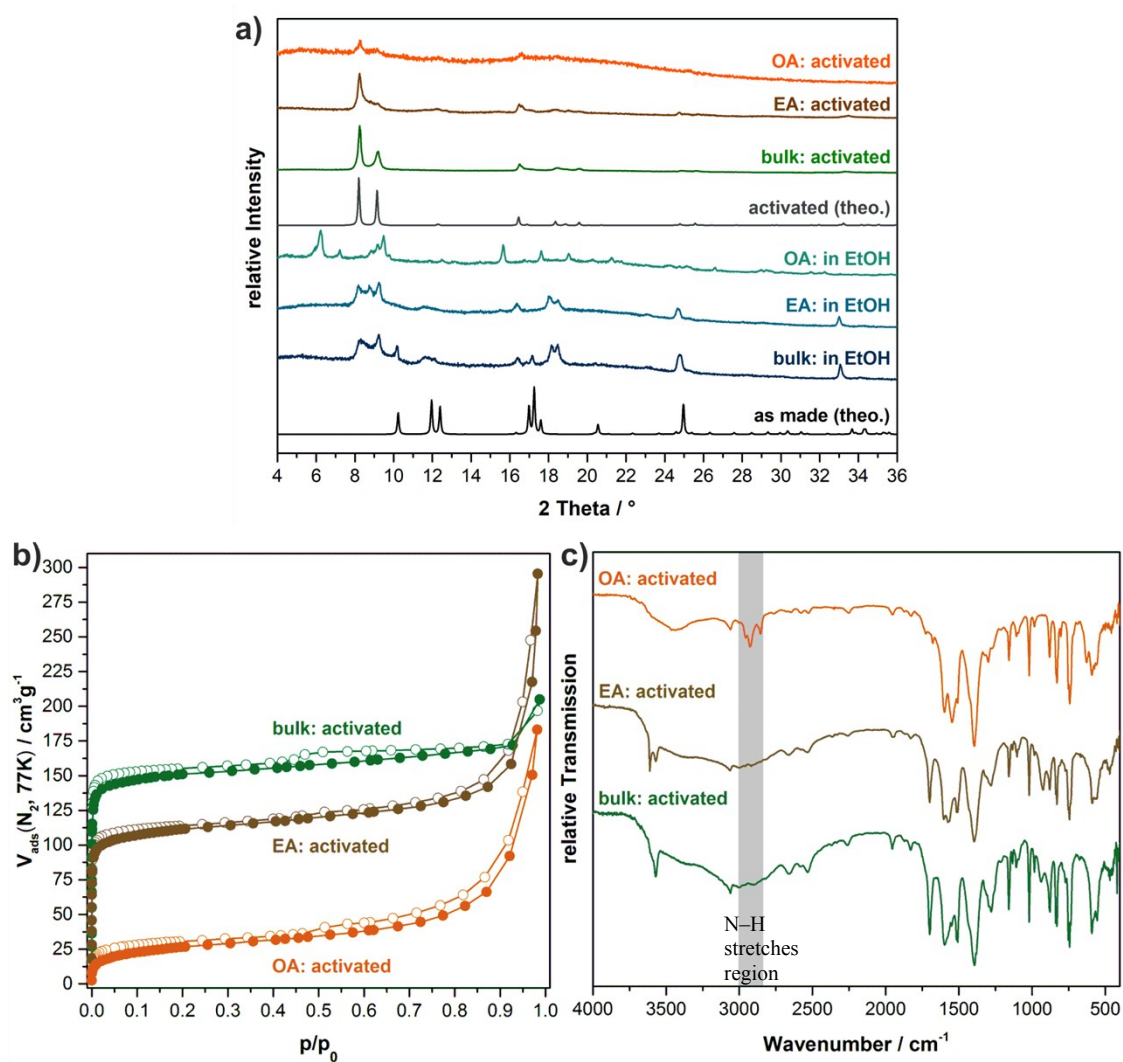

**Figure S5** a) PXRD patterns of  $\text{Cu}_2(\text{bdc})_2$ : theoretical (as synthesized and activated)<sup>1,2</sup>, after ethylamine (EA) and octylamine (OA) assisted delamination in ethanol, and after activation at 220 °C. b) Nitrogen physisorption isotherms at 77K. c) IR spectra of  $\text{Cu}_2(\text{bdc})_2$  bulk and delaminated materials after activation at 220 °C.



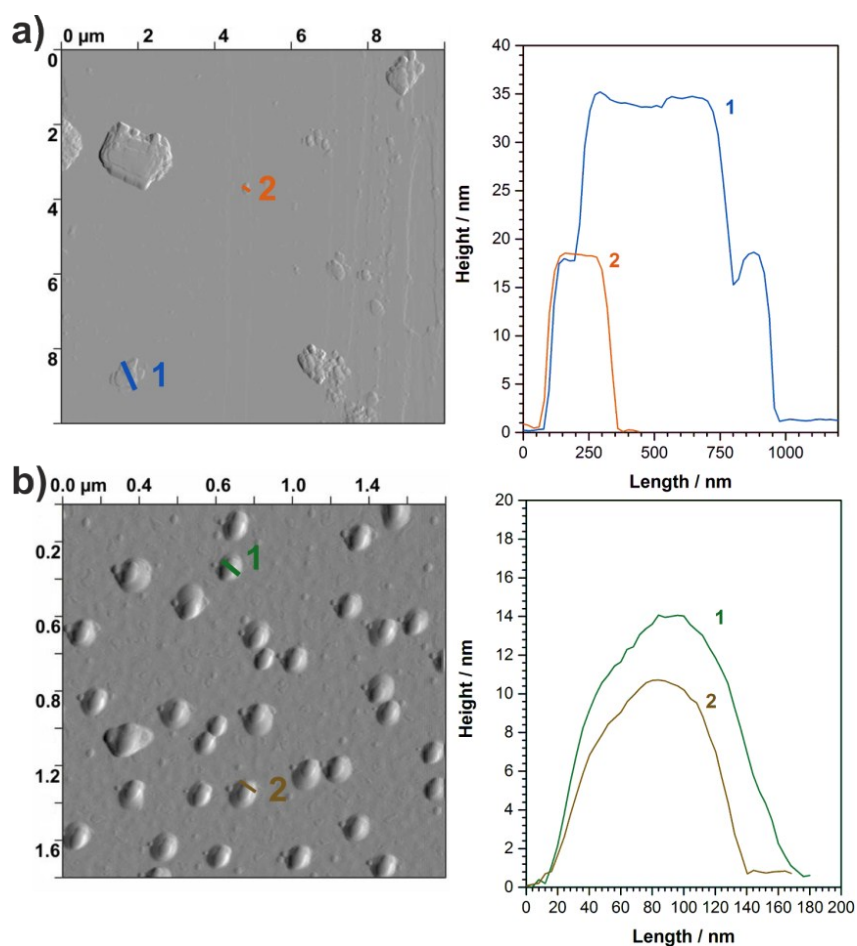

**Figure S6** AFM images (left) and height profiles (right), of the particles obtained from supernatant suspension after delamination with a) ethylamine and b) octylamine.

## 2.4 PVP assisted synthesis of $\text{Cu}_2(\text{bdc})_2$ and delamination with ethylamine

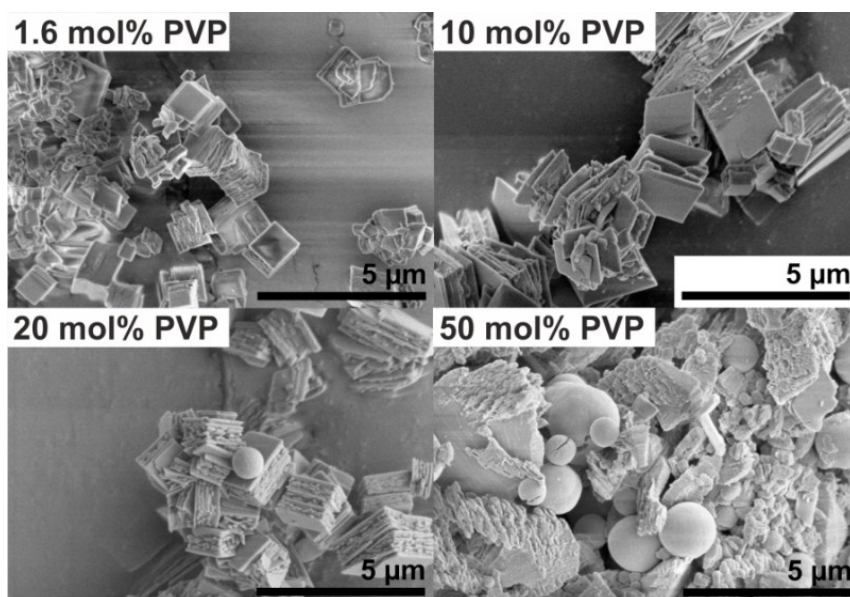

**Figure S7** SEM images of  $\text{Cu}_2(\text{bdc})_2$  obtained from direct synthesis with PVP using various PVP amounts in the synthesis.

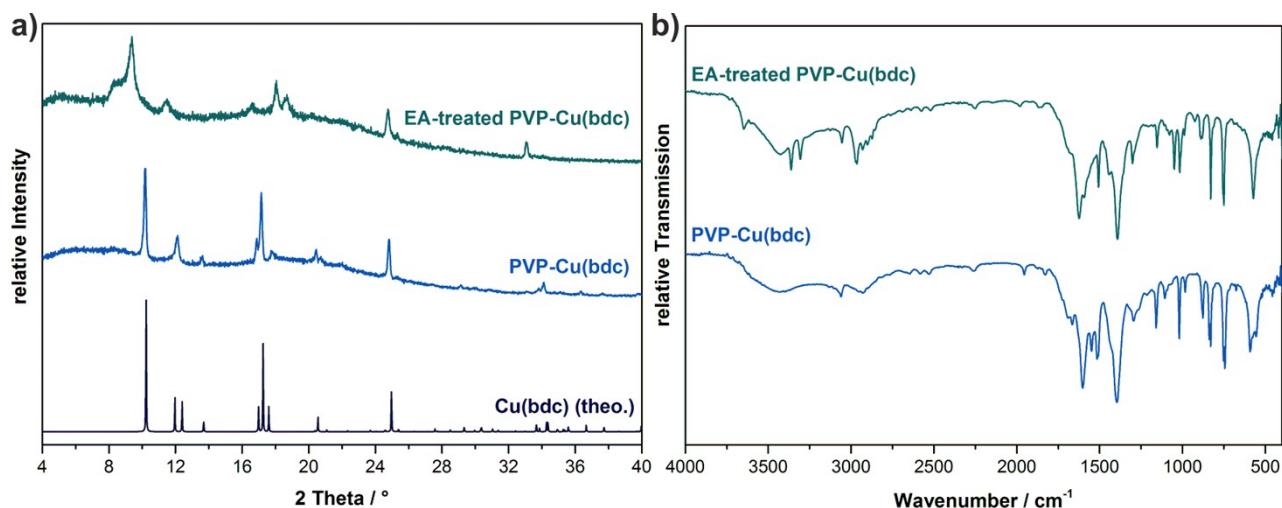

**Figure S8** a) Theoretical PXRD pattern of  $\text{Cu}_2(\text{bdc})_2(\text{DMF})_2$  (Ref. 2) (dark blue), PXRD patterns of  $\text{Cu}_2(\text{bdc})_2$  obtained in the PVP-assisted synthesis (10 mol% PVP) (light blue) and  $\text{Cu}_2(\text{bdc})_2$  after delamination with ethylamine (green). b) IR spectra of  $\text{Cu}_2(\text{bdc})_2\text{-PVP}$  (blue) and EA-treated  $\text{Cu}_2(\text{bdc})_2\text{-PVP}$  (green).

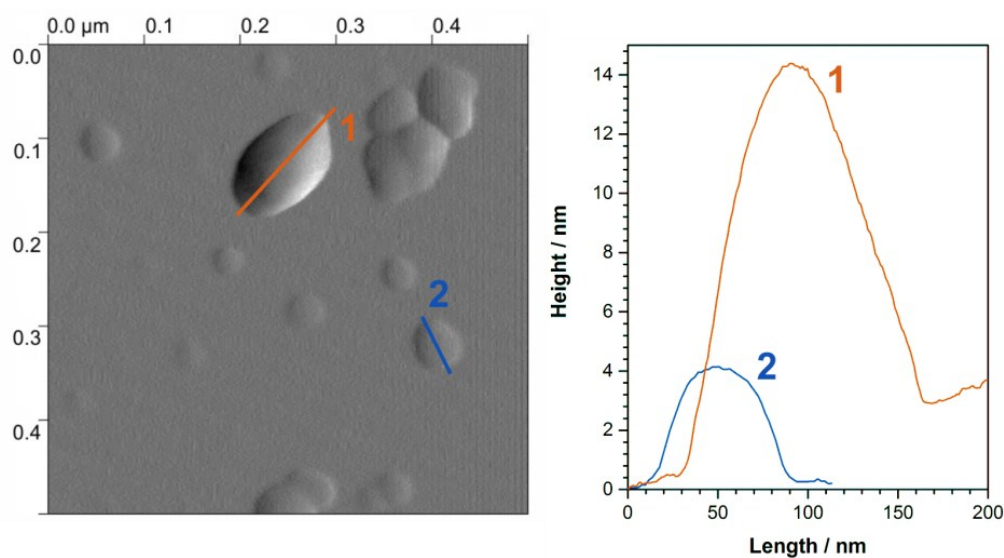

**Figure S9** AFM image (left) and height profiles (right) of the particles obtained from supernatant suspension after delamination of  $\text{Cu}_2(\text{bdc})_2\text{-PVP}$  with ethylamine.

## References

- [1] C. G Carson, G. Brunnello, S. G Lee, S. S. Jang, R. A. Gerhardt, R. Tannenbaum, *Eur. J. Inorg. Chem.* 2014, **12**, 2140.
- [2] C. G Carson, K. Hardcastle, J Schwartz, X. Liu, C Hoffmann, R. A. Gerhardt, R. Tannenbaum, *Eur. J. Inorg. Chem.* 2009, **16**, 2338.
